# Supplementary material for: Field-Testing a Proteomics-Derived Machine-Learning Model for Predicting Coral Bleaching Susceptibility
Source: MDPI journal article supplement (doi:10.3390/app13031718), 2023-01-29
Supplement: s1 [file s1]

Archive with 2 entries (2 files):
- Mayfield & Lin Supplemental File S1.pdf
- Mayfield & Lin Supplemental File S2.xlsx
