# Supplementary material for: Field-Testing a Proteomics-Derived Machine-Learning Model for Predicting Coral Bleaching Susceptibility
Source: MDPI journal article supplement (doi:10.3390/app13031718), 2023-01-29
Supplement: s1 [file s1 › Mayfield & Lin Supplemental File S2.xlsx]

## Sheet: field "test" samples
															Degree-heating weeks based on local threshold of 31.3C.
sample ID	site	site code	genotype	colony health designation	colony code	used in 2017 study?	used in 2018 study?	iTRAQ experimental sample	iTRAQ model field sample	depth (m)	sampled on 2019-7-10?	2019-7-10-time	2019-7-10 temp. (C)	2019-7-10 30-day trailing mean temp.	2019-7-10-DHWs	2019-7-10-CRW score	2019-7-10-diseased?	2019-7-10-old coring scars evident?	2019-7-10-coral condition/notes	2019-8-21-time	2019-8-21-temp (C)	2019-8-21-30-day trailing mean temp.	2019-8-21-DHWs	2019-8-21-CRW score	2019-8-21-diseased	2019-8-21-coring scars evident?	2019-8-21-coral condition/notes	2019-8-21-pics?	2019-8-21-site notes	2019-10-9-time	2019-10-9-temp (C)	2019-10-9-30-day trailing mean temp	2019-10-9-DHWs	2019-10-9-CRW score	2019-10-9-diseased	2019-10-9-coring scars evident?	10/2019-coral condition	Oct. 2019 site notes	2019-12-4-time	2019-12-4-temp (C)	2019-12-4-30-day trailing mean temp	2019-12-4-DHWs	2019-12-4-PAR daily dose	2019-12-4-CRW score	2019-12-4-CRW score-cont	2019-12-4-diseased	2019-12-4-coring scars evident?	12/2019-coral condition	Dec. 2019 site notes
Cheeca-3682	Cheeca Rocks	UKI1	light yellow	bleaching-resistant	B6	yes	yes	no	no	2.4	yes	17:40:00	30.5	31	4	E5	no	yes	no colony tag visible	15:05:00	31.1	31.7	10	E4	no	yes	huge colony with good pigmentation (likely having paled somewhat, though)	yes		14:40:00	28.1	28.8	10	E5	no	no	huge colony, good lesion healing	worst conditions I have ever seen at this site (1 ft)	14:02:00	23.8	24.5	0		E5	5	no	no
Cheeca-3132	Cheeca Rocks	UKI1	black-a	bleaching-resistant	B3	yes	yes	yes	yes	3.7	yes	17:50:00	30.5	31	4	E5	no	yes	healthy	14:50:00	31.1	31.7	10	E5	no	yes	good pigmentation, no signs of bleaching (though other Ofav at site definitely are)	yes		14:55:00	28.1	28.8	10	E5	no	yes	large colony, coring lesions still evident, good pigmentation		14:07:00	23.8	24.5	0		E5	5	no	no
Cheeca-3671	Cheeca Rocks	UKI1	light yellow	bleaching-susceptible	B5	yes	yes	yes	no	2.7	yes	17:35:00	30.5	31	4	E5	no	no	large colony with green hue	14:40:00	31.1	31.7	10	E3	no	no	colony is starting to pale	yes		14:45:00	28.1	28.8	10	E5	no	no	clearly has recovered from prior paling, good wound healing		14:09:00	23.8	24.5	0		E5	5	no	no	green hue
Cheeca-3950	Cheeca Rocks	UKI1	black-b	bleaching-susceptible	B4	yes	yes	no	no	2.4	yes	17:25:00	30.5	31	4	E5	no	yes	overall healthy	14:30:00	31.1	31.7	10	E3	no	unknown	paling though far from being totally bleached	yes		15:10:00	28.1	28.8	10	E4	no	yes	large colony with partial mortality and some paling areas		14:17:00	23.8	24.5	0		E5	5	no	yes
Cheeca-3938	Cheeca Rocks	UKI1	grey60	bleaching-susceptible	D5	yes	no	yes	no	3	yes	18:10:00	30.5	31	4	E5	no	yes	small colony	14:55:00	31.1	31.7	10	E3	no	yes	some paling	yes		14:30:00	28.1	28.8	10	E5	no	yes	coring lesions evident, unbleached		13:57:00	23.8	24.5	0		E5	5	maybe	yes	potential disease, see pics
Cheeca-3104	Cheeca Rocks	UKI1	grey60	bleaching-susceptible	D6	yes	no	yes	no	3.4	yes	18:15:00	30.5	31	4	E5	no	yes		14:45:00	31.1	31.7	10	E3	no	yes	colony in beginnings of bleaching	yes		14:50:00	28.1	28.8	10	E4	no	yes	no tag, coring lesions evident, decent coloration		14:05:00	23.8	24.5	0		E5	5	no	yes	dusky grey/brown color
Cheeca-3114	Cheeca Rocks	UKI1	grey60	bleaching-susceptible	D4	yes	no	yes	no	3.4	yes	18:05:00	30.5	31	4	E5	no	yes		15:00:00	31.1	31.7	10	E3	no	yes	the high-light sections are paling, whereas lower light regions are not	yes		14:35:00	28.1	28.8	10	E5	no	yes	good pigmentation, coring lesions evident		14:00:00	23.8	24.5	0		E5	5	no	yes	strange, dusky grey+brown color
Cheeca-3916	Cheeca Rocks	UKI1	light green	bleaching-susceptible	not cored	yes	no	no	yes	1.8	yes	17:50:00	30.5	31	4	E5	no	unknown	only patches of live tissue remaining, likely was once a huge colony	15:10:00	31.1	31.7	10	E3	no	no	monster colony with some paling areas	yes		15:25:00	28.1	28.8	10	E5	no	no	monster colony growing towards surface, no bleaching		14:11:00	23.8	24.5	0		E5	5	no	no
Cheeca-3939	Cheeca Rocks	UKI1	dark red	intermediate	D2	yes	no	no	yes	2.7	yes	17:30:00	30.5	31	4	E5	no	yes		14:35:00	31.1	31.7	10	E4	no	no	relatively darker than other colonies in vicinity	yes		15:05:00	28.1	28.8	10	E5	no	yes	no disease but very close to diseased colonies (see "habitat" pics)		14:20:00	23.8	24.5	0		E5	5	no	yes
Cheeca-3151	Cheeca Rocks	UKI1	grey60	intermediate	D3	yes	no	no	no	2.7	yes	17:35:00	30.5	31	4	E5	no	yes		14:25:00	31.1	31.7	10	E4	no	yes	paling: potentially early stages of bleaching	yes		15:10:00	28.1	28.8	10	E5	no	yes	large colony being smothered by Halimeda, no bleaching		14:13:00	23.8	24.5	0		E5	5	no	yes	dark grey color, some algal smothering, fully recovered from summer (partial) bleaching
Rocks-3975	The Rocks	UKI2	skyblue	intermediate	A5	yes	yes	no	no	3.4	yes	16:02:00	30.5	31	4	E5	no	yes		16:35:00	31.1	31.7	10	E4	no	no	some paling though overall good	yes	brain corals at site are bleaching badly	13:12:00	28.1	28.8	10	E5	no	yes	coring lesions still evident, very dark pigmentation	horrendous diving conditions	12:55:00	23.8	24.5	0	2.8	E5	5	no	yes
Rocks-3972	The Rocks	UKI2	skyblue	intermediate	A4	yes	yes	yes	no	2.7	yes	15:57:00	30.5	31	4	E5	no	unknown	right next to stake and instruments	16:30:00	31.1	31.7	10	E4	no	no	generally dark pigmentation except for part exposed to sun	yes		13:10:00	28.1	28.8	10	E5	no	no	very dark pigmentation	1-2 ft. visibility	12:50:00	23.8	24.5	0	2.8	E5	5	no	yes
Rocks-3983	The Rocks	UKI2	skyblue	intermediate	A6	yes	yes	no	no	1.5	yes	16:10:00	30.5	31	4	E5	no	yes	being engulfed by macroalgae	16:42:00	31.1	31.7	10	E4	no	unknown	some paling at top of colony, sampled paling portion	no		13:15:00	28.1	28.8	10	E5	no	yes	most of colony has died, coring lesions remain; otherwise looks healthy	28C	13:00:00	23.8	24.5	0	2.8	E5	5	no	yes	very shallow (growing to surface)
Rocks-3105	The Rocks	UKI2	skyblue	bleaching-susceptible	A2	yes	yes	yes	yes	1.2	yes	16:15:00	30.5	31	4	E5	no	yes		16:45:00	31.1	31.7	10	E3	no	unknown	very shallow colony, appears to be paling, sampled pale section	no		13:29:00	28.1	28.8	10	E5	no	no	very shallow, coring section has disappeared. Prop damage?	site is absolutely choked with algae	13:08:00	23.8	24.5	0	2.8	E5	5	no	unknown	growing just beneath the surface, high light
Rocks-3148	The Rocks	UKI2	skyblue	intermediate	A3	yes	yes	no	yes	1.2	yes	16:19:00	30.5	31	4	E5	no	yes	dark pigmentation	16:50:00	31.1	31.7	10	E4	no	unknown	large portion of colony was broken off by researchers, with some paling, sampled healthy portion	no		13:20:00	28.1	28.8	10	E4	no	yes	lighter pigmentation, likely due to growing so shallow (nearly to surface)		13:02:00	23.8	24.5	0	2.8	E5	5	no	unknown	growing just beneath surface, high light
Rocks-3906	The Rocks	UKI2	skyblue	bleaching-resistant	A1	no	no	no	yes	2.7	yes	16:05:00	30.5	31	4	E5	no	yes	old mortality unrelated to coring	16:40:00	31.1	31.7	10	E5	no	unknown	good pigmentation, likely best of the six	no		13:18:00	28.1	28.8	10	E5	no	yes	coring lesions still evident		13:18:00	23.8	24.5	0	2.8	E5	5	no	yes
LC-3991	Little Conch	UKO2	black-c	intermediate	C4	yes	yes	no	no	5.8	yes	14:35:00	30.5	31	4	E4	no	yes	light in color	10:10:00	31.1	31.7	10	E4	no	yes	likely paling with some white patches, sampled paling part	yes		11:46:00	28.1	28.8	10	E5	no	yes	no bleaching or disease, too much algae on reef	as with The Rocks, there is a staggering	11:35:00	23.8	24.5	0	0.4	E4	4	no	yes	pale colony being smothered by algae. macroalgae smothering entire reef
LC-3149	Little Conch	UKO2	black-d	intermediate	C1	yes	yes	no	no	5.3	yes	14:25:00	30.5	31	4	E5	no	yes	very large colony with partial mortality	09:45:00	31.1	31.7	10	E4	no	no	unbleached, though with some paling patches, sampled paling patch	yes		11:50:00	28.1	28.8	10	E5	no	yes	coring lesions evident, good pigmentation	amount of algae at this site, despite	11:33:00	23.8	24.5	0	0.4	E5	5	no	yes	abundance of algae at site
LC-3698	Little Conch	UKO2	black-e	bleaching-susceptible	C5	yes	yes	yes	no	5.8	yes	14:15:00	30.5	31	4	E5	no	yes		09:50:00	31.1	31.7	10	E3	no	unknown	colony appears to be paling, yet far from fully bleached	yes		12:00:00	28.1	28.8	10	E5	no	yes	coring scars, good pigmentation, no bleaching or disease	abundant fish life	11:30:00	23.8	24.5	0	0.4	E5	5	no	yes
LC-3694	Little Conch	UKO2	black-f	bleaching-susceptible	C2	yes	yes	yes	yes	5.3	yes	14:55:00	30.5	31	4	E5	no	unknown	colony had toppled (Irma?) resulting in some mortality	10:15:00	31.1	31.7	10	E1	no	unknown	badly bleaching, sampled relatively darker part	yes		11:55:00	28.1	28.8	10	E4	maybe	yes	no tag, coring lesions evident, some pigment anomalies		11:28:00	23.8	24.5	0	0.4	E4	4	no	yes	some strange pigment anomalies, see pics
LC-3989	Little Conch	UKO2	black-g	intermediate	C3	no	yes	no	yes	5.6	yes	14:10:00	30.5	31	4	E5	no	yes		09:35:00	31.1	31.7	10	see pic	no	yes	lots of partial mortality (unrelated to coring)	yes		12:05:00	28.1	28.8	10	E5	no	yes	coring lesions evident, good pigmentation, no disease		11:18:00	23.8	24.5	0	0.4	E5	4	no	yes	some algal overgrowth
LC-3154	Little Conch	UKO2	black-h	bleaching-susceptible	C6	yes	yes	no	no	5.8	yes	14:17:00	30.5	31	4	E5	no	yes	needs new tag	09:55:00	31.1	31.7	10	see pic	YES	unknown	yellow blotch disease (?), see pic, sampled well away from disease	yes		11:58:00	28.1	28.8	10	E4	yes	yes	yellow blotch disease? Sampled away from it, coring lesions evident		11:25:00	23.8	24.5	0	0.4	E4	4	maybe	yes	recent mortality, could be due to disease, see pics
LC-3921	Little Conch	UKO2	black-i	bleaching-resistant	not cored	no	no	no	yes	5.6	yes	14:21:00	30.5	31	4	E5	no	NA	fluorescent green hue, partial mortality	10:00:00	31.1	31.7	10	E5	no	NA	no evidence of bleaching or disease: dark green fluorescent hue	yes		12:07:00	28.1	28.8	10	E5	no	NA	was this ever cored? No evidence of it, good pigmentation		11:22:00	23.8	24.5	0	0.4	E5	5	no	NA
LC-3674	Little Conch	UKO2	black-k	bleaching-susceptible	not cored	no	no	no	no	5.9	yes	14:37:00	30.5	31	4	E5	no	NA	near sand apron with a lot of sand between coralites	10:05:00	31.1	31.7	10	E3	no	NA	some partially bleached sections, one of which was sampled	yes		11:42:00	28.1	28.8	10	E5	no	NA	large, healthy, over sand apron		11:38:00	23.8	24.5	0	0.4	E4	4	no	NA	overall healthy though with some pale sections, very little coralite mortality
LC-3676	Little Conch	UKO2	black-l	bleaching-susceptible	not cored	no	no	no	no	4.5	yes	15:00:00	30.5	31	4	E5	no	NA	base of colony has died though top is healthy	10:25:00	31.1	31.7	10	E3	no	NA	paling across colony, though more at top, sampled paling part	yes		11:35:00	28.1	28.8	10	E5	no	NA	good pigmentation		11:35:00	23.8	24.5	0	0.4	E5	5	no	NA
LC-3128	Little Conch	UKO2	black-m	bleaching-resistant	not cored	no	no	no	no	5.5	yes	14:45:00	30.5	31	4	E5	no	NA	very small colony though with good pigmentation	09:40:00	31.1	31.7	10	E5	no	NA	only 10-20% of original colony is alive, though no signs of bleaching	yes		11:31:00	28.1	28.8	10	E5	no	NA	healthy pigmentation		11:40:00	23.8	24.5	0	0.4	E5	5	no	NA	extensive boring though with good pigmentation
CR-3165	Crocker Reef	UK01	black-r	bleaching-resistant	not cored	no	no	no	yes	11.5	yes	12:25:00	30.5	31	4	E5	no	NA	most of colony had died (old mortality)	13:05:00	31.1	31.7	10	E5	no	NA	most of colony has died off, but it is not bleaching	yes		09:40:00	28.1	28.8	10	E5	no	NA	most of colony has died off		09:40:00	23.8	24.5	0		E4	4	no	NA	covered in fish bites, could be mistaken for yellow blotch disease
CR-3166	Crocker Reef	UK01	dark green	unknown	not cored	no	no	no	no	12.7	yes	12:45:00	30.5	31	4	E5	no	NA	healthy pigmentation though being overgrown by Cliona		31.1	31.7	10		NA	NA	could not find: needs new tag	no		10:00:00	28.1	28.8	10	E5	no	NA	do not have sample from August		10:05:00	23.8	24.5	0		E5	5	no	NA	most of the colony has died off but few remaining patches of tissue appear healthy
CR-3679	Crocker Reef	UK01	NOT GENOTYPED	intermediate	not cored	no	no	no	yes	11.3	yes	11:25:00	30.5	31	4	E5	no	NA	most of colony had died	12:55:00	31.1	31.7	10	E4	no	NA	overall good pigmentation, though some paling areas, one of which was sampled	yes		09:29:00	28.1	28.8	10	E5	no	NA	large, healthy colony, my prior lesion has healed		09:29:00	23.8	24.5	0		E5	5	no	NA	one of the largest, most intact colonies left at this depauperate site
CR-3915	Crocker Reef	UK01	black-w	diseased	not cored	no	no	no	no	12.5	yes	11:45:00	30.5	31	4	E5	no	NA	most of colony had died. No bleaching or disease.	13:15:00	31.1	31.7	10	E5	see pic	NA	relatively dark pigmentation though with some pigment anomalies	yes		09:18:00	28.1	28.8	10	E4	possibly-see pic	NA	partial mortality, may have yellow blotch disease		09:18:00	23.8	24.5	0		E4	4	no	NA	covered in fish bites, could be mistaken for yellow blotch disease
CR-3986	Crocker Reef	UK01	black-aa	bleaching-susceptible	not cored	no	no	no	yes	11.3	yes	12:00:00	30.5	31	4	E4	no	NA	relatively light coloration	13:00:00	31.1	31.7	10	E3	no	NA	paling, though far from being totally bleached	no	forgot to take pic of whole colony	09:35:00	28.1	28.8	10	E4	no	NA	fairly pale green, could not find old tag		09:32:00	23.8	24.5	0		E3	3	yes	NA	colony has succumbed to SCTLD and was not sampled. disease appeared since Oct.
	A representative Phast Gel featuring a BSA standard (right-most, singular band) and 0.3 ul of coral proteins (~500 ng of protein loaded)

## Sheet: raw data
												host coral proteins (normalized to "normalizer" sample with iTRAQ label 113; see main text for details.).											endosymbiont proteins (normalized to "normalizer" sample with iTRAQ label 113; see main text for details.).					Multidimensional scaling (MDS) coordinates derived from analysis of raw iTRAQ data. See "MDS" worksheet for first two dimensions plotted
sample	iTRAQ batch	iTRAQ label	genotype	site	date	shelf	colony health designation-field	fragment health designation	validation with test	validation	validation with test-2	OFAVBQ_DN222422_c2_g1_i4	OFAVBQ_DN204090_c1_g1_i1	OFAVBQ_DN221212_c1_g1_i1	OFAVBQ_DN221258_c1_g2_i8	OFAVBQ_DN220189_c1_g1_i3	OFAVBQ_DN153972_c0_g1_i1	OFAVBQ_DN214371_c5_g2_i1	OFAVBQ_DN208218_c2_g1_i13	OFAVBQ_DN113909_c0_g1_i1	OFAVBQ_DN113413_c0_g1_i1	OFAVBQ_DN223604_c1_g1_i2	SYMBOF_DN99941_c0_g1_i1	SYMBOF_DN75265_c0_g1_i2	SYMBOF_DN66880_c0_g1_i1	SYMBOF_DN174588_c0_g1_i1	SYMBOF_DN115963_c0_g1_i1	holobiont MDS dimension 1	holobiont MDS dimension 2	holobiont MDS dimension 3	holobiont MDS dimension 4	host coral MDS dimension 1	host coral MDS dimension 2	host coral MDS dimension 3	host coral MDS dimension 4	endosymbiont MDS dimension 1	endosymbiont MDS dimension 2	endosymbiont MDS dimension 3	T²
Cheeca-3132-7-19	1	114/113	black-a	Cheeca Rocks	2019-07-01	inshore	BLR	HC	Training	Training	Training	1.26915	0.86455	1	1.17857	1.14177	0.875602	1.61625	0.91925	1.85175	0.630946	1.4918	0.934001	1.21594	0.874932	0.64187	0.873563	-0.162298	-0.124786	0.0201061	-0.00939267	-0.191525	-0.0675257	-0.11501	-0.132422	-0.0716093	-0.130689	0.0858854	1.79789
Cheeca-3916-7-19	1	115/113	lightgreen	Cheeca Rocks	2019-07-01	inshore	BLS	HC	Training	Validation	Training	0.31403	0.460957	0.498205	0.571429	1.31324	0.5626	0.764706	0.567473	1.00839	0.407505	1.00234	0.416943	0.998551	0.467907	0.36397	0.802299	-0.204677	-0.279694	-0.358604	0.0368516	-0.275625	-0.1963	0.227405	0.321032	-0.392994	-0.164026	0.123017	1.96716
Cheeca-3939-7-19	1	116/113	darkred	Cheeca Rocks	2019-07-01	inshore	INT	HC	Validation	Training	Training	0.632564	0.818235	0.59799	0.714286	0.790323	0.960674	1.95658	2.00256	1.96783	0.470831	1.57963	0.617873	2.06957	1.02014	0.453671	0.944061	0.0882078	-0.00878723	0.303732	-0.137906	0.0938508	-0.0145489	-0.31207	0.10889	-0.0557526	0.300363	0.132584	1.5418
CR-3165-7-19	1	117/113	black-r	Crocker Reef	2019-07-01	offshore	BLR	HC	Validation	Training	Test	1.08352	0.608633	0.839914	0.857143	0.765705	0.900482	1.9916	2.54026	1.62238	0.436496	1.3829	1.0528	2.26522	1.3932	0.436319	0.955556	0.0547891	-0.0324271	0.456711	0.0367598	0.0509736	-0.135889	-0.439447	0.102305	0.199827	0.3317	0.205505	4.4618
CR-3679-7-19	1	118/113	unknown	Crocker Reef	2019-07-01	offshore	INT	HC	Training	Training	Training	0.906484	0.410935	0.894472	0.714286	1.16808	0.91573	1.82633	1.68094	1.94266	0.557063	1.26112	0.934785	1.91014	0.865748	0.568437	0.614559	-0.0102712	-0.134828	0.25523	-0.0710319	-0.00718603	-0.141616	-0.24535	0.00424583	-0.0508408	0.160604	0.255012	4.235
CR-3986-7-19	1	119/113	black-aa	Crocker Reef	2019-07-01	offshore	BLS	HC	Training	Validation	Training	0.373368	0.586139	0.912419	0.892857	0.612054	1.20546	2.04762	2.25412	1.7972	1.17367	1.64871	1.01449	2.13333	1.77595	1.10457	0.939464	0.12007	0.21878	0.397029	-0.0248192	0.15804	0.13369	-0.411887	-0.0112998	0.375713	0.282177	-0.0366307	4.31139
LC-3694-7-19	2	114/113	black-f	Little Conch	2019-07-01	offshore	BLS	HC	Validation	Training	Test	1.20257	0.875981	0.689279	1.91001	1.14025	0.884398	1.08488	0.927978	1.65372	0.801201	1.25873	0.823029	1.12803	1.15928	0.813332	0.939177	-0.303198	0.0472168	-0.112388	-0.0223197	-0.334625	0.109826	0.0814802	-0.136919	0.00478016	-0.137463	-0.0157952	0.796382
LC-3921-7-19	2	115/113	black-i	Little Conch	2019-07-01	offshore	BLR	HC	Test	Training	Training	1.65916	0.772811	0.657294	0.917617	1.26183	0.709782	1.05285	0.905817	1.75654	0.721094	1.14483	0.995408	1.42175	1.28154	0.755852	0.985532	-0.295699	-0.103971	0.0573846	0.0973048	-0.353429	-0.176393	-0.0199623	-0.0505994	0.112718	-0.0295382	0.0251294	1.28752
LC-3989-7-19	2	116/113	black-g	Little Conch	2019-07-01	offshore	INT	HC	Validation	Training	Training	0.780191	0.812859	0.676406	1.12167	1.16596	0.850445	1.03499	1.2133	1.66149	0.822518	0.952568	0.886743	1.87756	1.45148	0.86983	1.11423	-0.194619	0.0909793	0.110498	0.0245282	-0.219433	0.0281388	0.00905756	0.0452698	0.18726	0.183338	-0.0250929	1.54496
Rocks-3105-7-19	2	117/113	skyblue	The Rocks	2019-07-01	inshore	BLS	HC	Test	Validation	Training	0.353893	1.09641	0.658012	2.08745	0.939387	0.915926	1.04838	1.07941	1.50884	0.932297	1.24368	0.770617	1.51393	1.07501	1.0006	1.18359	-0.219243	0.231906	-0.140111	-0.0921797	-0.214733	0.316815	0.151292	-0.0559291	0.0173967	0.0439179	-0.126717	2.95196
Rocks-3148-7-19	2	118/113	skyblue	The Rocks	2019-07-01	inshore	INT	HC	Training	Training	Training	0.389972	1.23347	0.488674	1.56527	0.94734	0.860146	1.20507	1.05448	1.23196	1.05917	1.01643	1.01662	1.46021	1.25779	1.08463	1.1092	-0.140378	0.210369	-0.132386	0.0561051	-0.1406	0.210185	0.184947	0.0695831	0.141876	-0.0157619	-0.124897	2.44444
Rocks-3906-7-19	2	119/113	skyblue	The Rocks	2019-07-01	inshore	BLR	HC	Training	Training	Training	0.921555	1.13039	0.516357	1.53866	1.02006	1.24656	1.20469	1.20499	1.62931	0.938513	1.16801	0.643027	1.93176	1.20201	0.976646	1.80305	-0.231026	0.246867	0.0973967	-0.0934618	-0.238203	0.182885	-0.00906241	-0.0180053	0.0878338	0.329996	-0.287238	2.59044
Cheeca-3132-8-19	3	114/113	black-a	Cheeca Rocks	2019-08-01	inshore	BLR	HTA	Training	Test	Excluded	1.23524	0.92698	0.921054	0.897059	0.84583	0.374362	1.59926	0.901298	2.24686	0.915893	0.970209	0.507	1.36878	0.943349	0.96659	0.816441	-0.112408	-0.212152	0.00649376	-0.135932	-0.0910888	-0.163048	-0.0313788	-0.247958	-0.166178	0.00213069	-0.0832479	2.84524
Cheeca-3916-8-19	3	115/113	lightgreen	Cheeca Rocks	2019-08-01	inshore	BLS	AB	Training	Test	Excluded	0.969799	0.851751	0.808901	0.793478	0.824107	0.0964265	1.52958	0.925447	1.96654	0.528255	1.16345	0.93282	1.20049	1.88828	0.562788	0.690343	-0.0498001	-0.222751	0.0731773	0.198358	-0.0656208	-0.247277	0.0066045	-0.105769	0.296496	-0.0862147	0.266474	3.63461
Cheeca-3939-8-19	3	116/113	darkred	Cheeca Rocks	2019-08-01	inshore	INT	SLS	Training	Test	Excluded	1.36573	0.715443	0.648877	0.959719	0.801682	0.0998298	1.77973	0.710832	0.82653	0.530743	1.02415	1.20477	1.19956	1.44252	0.559332	0.837191	-0.0132521	-0.162614	-0.125327	0.308531	-0.0453729	-0.281375	0.294144	0.0307216	0.191015	-0.154338	0.138286	2.4795
LC-3694-8-19	3	117/113	black-f	Little Conch	2019-08-01	offshore	BLS	AB	Training	Test	Excluded	0.335696	0.507202	1.01977	0.387468	0.789068	0.206466	2.6078	1.05398	1.01666	0.498619	0.847021	0.456668	1.79316	0.635598	0.50288	0.652833	0.261056	-0.354717	-0.0279044	-0.0292319	0.308279	-0.317937	0.104966	0.120886	-0.266836	0.167409	0.180205	2.74633
LC-3921-8-19	3	118/113	black-i	Little Conch	2019-08-01	offshore	BLR	HTA	Training	Test	Excluded	0.555491	0.783193	1.40556	0.662404	0.652418	0.138968	3.76315	1.03442	1.38108	0.539662	0.897746	0.614494	1.34382	1.08963	0.567972	1.21149	0.525157	-0.246512	-0.0320659	0.0447144	0.611834	-0.274961	0.133787	-0.113719	-0.0518004	0.0338938	0.0233033	3.36235
LC-3989-8-19	3	119/113	black-g	Little Conch	2019-08-01	offshore	INT	SLS	Validation	Test	Excluded	0.180763	0.608921	0.885963	0.414962	0.693062	0.352808	3.0963	1.19516	1.94607	0.388519	0.538647	0.355051	1.73604	0.552893	0.448733	1.17638	0.377796	-0.2705	0.0442436	-0.233508	0.447512	-0.302711	-0.0775597	-0.135201	-0.30748	0.235753	0.00902514	3.31777
CR-3165-8-19	4	114/113	black-r	Crocker Reef	2019-08-01	offshore	BLR	HTA	Validation	Test	Excluded	0.827652	0.913965	0.621844	1.91001	0.975913	0.856725	1.60419	0.927978	1.61931	0.871839	0.905692	0.745368	1.12954	0.775084	0.992982	1.04215	-0.121478	0.0588348	-0.209465	-0.0975228	-0.121965	0.131298	0.167641	-0.151588	-0.136439	-0.136718	-0.124575	2.09468
CR-3679-8-19	4	115/113	unknown	Crocker Reef	2019-08-01	offshore	INT	SLS	Training	Test	Excluded	1.29407	0.831115	0.595549	0.917617	0.971251	0.800718	1.31813	0.905817	1.37379	0.59641	0.699984	1.19785	1.23195	1.57525	0.536842	1.15289	-0.166432	-0.0602813	-0.0571818	0.225005	-0.20593	-0.155179	0.140562	-0.00856594	0.282429	-0.130935	0.0598664	2.44509
CR-3986-8-19	4	116/113	black-aa	Crocker Reef	2019-08-01	offshore	BLS	AB	Validation	Test	Excluded	0.611306	0.76548	0.574021	1.12167	0.902875	0.831322	1.36005	1.2133	1.79034	0.714125	0.741795	0.455469	1.27608	0.825251	0.697544	0.836364	-0.0866055	-0.042698	-0.0319163	-0.158598	-0.0722063	0.0175493	0.0261506	-0.0198331	-0.223818	-0.0397447	0.0156745	1.93996
Rocks-3105-8-19	4	117/113	skyblue	The Rocks	2019-08-01	inshore	BLS	AB	Training	Test	Excluded	0.555518	1.09824	0.919186	2.08745	0.752137	0.936695	1.29593	1.07941	1.6331	1.01238	1.09381	0.624626	1.39693	1.10368	1.17333	1.21901	-0.177215	0.187275	-0.144616	-0.176219	-0.141755	0.277436	0.121758	-0.167137	-0.0114503	0.0118867	-0.215912	4.14738
Rocks-3148-8-19	4	118/113	skyblue	The Rocks	2019-08-01	inshore	INT	SLS	Validation	Test	Excluded	0.7621	1.05881	1.2658	1.56527	0.796426	0.90118	1.77312	1.05448	1.47034	0.855258	0.777942	0.505678	1.37162	0.751672	0.69614	0.721488	0.000960584	-0.0450139	-0.167738	-0.174322	0.0300037	0.0882165	0.134603	-0.183039	-0.234986	-0.0104793	0.0586942	3.11423
Rocks-3906-8-19	4	119/113	skyblue	The Rocks	2019-08-01	inshore	BLR	HTA	Training	Test	Excluded	0.580878	0.878733	1.21707	1.53866	0.817405	1.11726	1.51171	1.20499	2.14759	0.694488	0.812997	0.252839	1.22639	0.656355	0.517193	0.639669	-0.0894606	-0.0577441	-0.0555001	-0.331889	-0.0513688	0.136865	-0.0610592	-0.267684	-0.373579	-0.0382066	0.0999366	4.46167
Cheeca-3132-12-19	5	114/113	black-a	Cheeca Rocks	2019-12-01	inshore	BLR	HC	Training	Training	Validation	1.48964	0.805122	0.735008	1.04542	1.76196	0.747777	1.17707	1.14406	1.50136	0.582358	1.49452	1.71741	1.1749	0.899414	0.58408	0.783991	-0.299962	-0.0521138	0.124706	0.272869	-0.355977	-0.12933	-0.106995	0.115717	0.125365	-0.379869	0.226199	3.94175
Cheeca-3916-12-19	5	115/113	lightgreen	Cheeca Rocks	2019-12-01	inshore	BLS	HC	Training	Training	Training	0.46554	1.57852	0.476679	1.08126	2.31067	0.55763	6.76257	1.20052	1.75543	1.61849	1.37637	0.818919	1.42901	0.849278	1.60199	1.00768	1.31546	0.229023	-0.140031	0.118919	1.57406	0.247432	0.119748	0.0475746	-0.0454739	-0.0339148	-0.388034	4.72631
Cheeca-3939-12-19	5	116/113	darkred	Cheeca Rocks	2019-12-01	inshore	INT	HC	Training	Validation	Test	0.752207	2.04737	0.696053	0.998199	1.21154	0.534937	1.85582	1.37294	1.49592	0.991723	1.44458	0.694111	1.25309	0.871114	0.948259	1.00219	0.156639	0.168606	-0.160151	0.0647644	0.133574	0.213112	0.0559651	0.238404	-0.110192	-0.0736202	-0.0924157	3.42258
Rocks-3148-12-19	5	118/113	skyblue	The Rocks	2019-12-01	inshore	INT	HC	Test	Training	Validation	0.332718	1.19029	0.497693	1.01459	1.42361	0.732313	1.52715	1.43779	1.57201	0.97936	1.7771	0.693732	1.02366	1.1104	0.865672	1.09868	0.0565735	0.217208	-0.00317135	0.0832952	-0.0551217	0.147277	-0.0995571	0.253465	-0.0373123	-0.173556	-0.0881973	2.54423
Rocks-3906-12-19	5	119/113	skyblue	The Rocks	2019-12-01	inshore	BLR	HC	Training	Validation	Training	0.377945	1.42794	0.360841	0.970069	0.905427	0.856346	1.40911	1.1709	2.40489	1.25306	1.41291	0.717806	0.984568	1.01866	1.22289	1.27632	0.0454553	0.305167	-0.0385496	-0.168906	-0.0684213	0.32696	-0.194591	0.0401962	-0.0343722	-0.189553	-0.254964	2.67643
Rocks-3105-12-19	5	121/113	skyblue	The Rocks	2019-12-01	inshore	BLS	HC	Training	Training	Validation	0.669404	1.0398	0.3347	0.955126	1.32049	0.842314	1.23678	1.15191	0.641304	0.90099	1.23873	1.79542	1.36523	1.80995	0.850746	1.30044	-0.124144	0.19936	-0.00960091	0.389236	-0.15794	0.0364067	0.163818	0.307376	0.548403	-0.158544	-0.0410803	3.16916
							BLS=bleaching-susceptible	HC=healthy control
							BLR=bleaching-resistant	HTA=high-temperature-acclimating
							INT=intermediate	SLS=sub-lethally stressed
								AB=actively bleaching

## Sheet: univariate data
variation in protein levels across the 30 field coral samples
																log2-transformed data						Heat map of standardized data							Aberrancy plot: values that fellow below two standard deviations below the mean or above two standard deviations
																													above the mean were scored as "1" and are shown in red. Grey cells instead reflect values of 0 (no aberrancy).
																													The sum of all red cells is called the "heat map score" and ranged from 0 to 4.
																					In both of the right two heat maps, samples have been encoded by their colony health designations (CHD-field): bleaching-susceptible (BLS; red), bleaching-resistant (BLR; green), or intermediate (INT; blue).
														Proteins with statistically significant variation across months
																					Dec>Aug=July
																					Dec>Aug=July
																					December=July>August

## Sheet: PCA
Principal components analysis of all 16 proteins, with icons encoded by shelf: I=inshore and O=offshore.																	Principal components analysis of the 11 host coral proteins only, with icons encoded by shelf: I=inshore and O=offshore												Principal components analysis of the six endosymbiont proteins only, with icons encoded by shelf: I=inshore and O=offshore
The colors instead correspond to the samlping month: orange=July, red=August (bleaching), and green=December.																	The colors instead correspond to the samlping month: orange=July, red=August (bleaching), and green=December.												The colors instead correspond to the samlping month: orange=July, red=August (bleaching), and green=December.
Data were log2-transformed, and the mean positions of the July (7), August (8), and December (12) samples are marked by red squares.																	Data were log2-transformed.												Data were log2-transformed.
Eigenvectors	Prin1	Prin2	Prin3	Prin4	Prin5	Prin6	Prin7	Prin8	Prin9	Prin10	Prin11	Prin12	Prin13	Prin14	Prin15	Prin16	Eigenvectors												Eigenvectors
OFAVBQ_DN222422_c2_g1_i4	0.06786	-0.22700	0.32903	0.43527	0.28915	0.14225	0.11756	0.43181	0.058	-0.05703	-0.24452	0.0653	-0.48679	0.09739	-0.15773	0.00498	Protein	Prin1	Prin2	Prin3	Prin4	Prin5	Prin6	Prin7	Prin8	Prin9	Prin10	Prin11	Protein			Prin1	Prin2	Prin3	Prin4	Prin5
OFAVBQ_DN204090_c1_g1_i1	0.35637	0.02537	-0.24481	-0.09234	0.24114	0.0644	-0.11337	0.13064	0.47074	-0.35160	-0.32839	0.2556	0.19923	-0.30106	0.23632	-0.08432	OFAVBQ_DN222422_c2_g1_i4	0.07035	-0.19910	0.44673	-0.14827	0.66441	-0.08266	0.11723	-0.45070	-0.20097	0.13006	0.10681	SYMBOF_DN99941_c0_g1_i1			0.52788	0.2935	-0.45604	-0.01042	0.65355
OFAVBQ_DN221212_c1_g1_i1	-0.28873	0.19914	-0.02093	0.30652	0.39393	0.05753	0.2397	-0.14279	0.24677	0.39816	0.1525	0.44708	0.30661	0.08021	-0.04906	-0.02896	OFAVBQ_DN204090_c1_g1_i1	0.40915	0.02751	-0.18432	0.43302	0.14033	-0.10111	-0.17736	-0.26775	0.62584	0.26671	0.12033	SYMBOF_DN75265_c0_g1_i2			0.11066	0.60788	0.73476	0.23371	0.15407
OFAVBQ_DN221258_c1_g2_i8	0.32065	-0.01039	-0.13856	0.41133	0.14369	-0.19295	0.24599	-0.14409	0.24657	-0.00072	0.12624	-0.66682	0.18688	0.00832	-0.07238	0.08897	OFAVBQ_DN221212_c1_g1_i1	-0.31951	0.28913	0.34911	0.23332	0.25617	-0.09951	0.28172	0.54069	0.23691	0.35891	-0.07627	SYMBOF_DN66880_c0_g1_i1			0.58533	0.29949	-0.17834	-0.01296	-0.73193
OFAVBQ_DN220189_c1_g1_i3	0.22723	-0.24284	-0.02391	-0.06149	-0.30124	0.51481	0.2684	0.29983	-0.07033	0.09279	-0.07084	0.01767	0.49883	0.27604	-0.15144	-0.02197	OFAVBQ_DN221258_c1_g2_i8	0.40159	-0.03785	0.39157	0.30781	-0.02942	-0.22335	0.17463	0.15041	0.04721	-0.66889	-0.18897	SYMBOF_DN174588_c0_g1_i1			0.41313	-0.56014	0.16985	0.69603	0.04748
OFAVBQ_DN153972_c0_g1_i1	0.23085	0.22803	-0.03246	0.34589	-0.50173	-0.11463	0.23742	0.07651	0.05668	-0.09782	0.2859	0.2685	-0.19851	0.11129	0.41952	-0.22916	OFAVBQ_DN220189_c1_g1_i3	0.30902	-0.26403	-0.26962	-0.24099	0.28711	0.52038	0.36543	0.23433	0.18592	0.00753	-0.35737	SYMBOF_DN115963_c0_g1_i1			0.4425	-0.37534	0.43761	-0.67871	0.10568
OFAVBQ_DN214371_c5_g2_i1	-0.10933	0.30025	-0.06185	-0.41000	0.32935	0.36923	0.2585	0.21749	0.11815	-0.07707	0.3238	-0.28277	-0.23680	0.16833	0.27003	-0.07085	OFAVBQ_DN153972_c0_g1_i1	0.35667	0.1933	0.2828	-0.25687	-0.39468	0.18622	0.42378	-0.02906	0.0729	0.16377	0.5352
OFAVBQ_DN208218_c2_g1_i13	0.0431	0.52956	0.27723	-0.01478	-0.16199	0.0928	-0.04751	-0.06301	0.2162	-0.39949	0.09997	0.05958	0.03291	0.03331	-0.61368	0.02954	OFAVBQ_DN214371_c5_g2_i1	-0.16295	0.37869	-0.46938	0.23817	0.32876	0.04819	0.39803	-0.11101	-0.13525	-0.34831	0.36364
OFAVBQ_DN113909_c0_g1_i1	0.01258	0.36932	-0.15660	0.3662	0.08616	0.21261	-0.53543	0.37705	-0.34035	0.07568	0.12762	-0.11439	0.18052	-0.14535	0.099	0.09423	OFAVBQ_DN208218_c2_g1_i13	0.07059	0.59106	-0.04898	-0.37023	-0.05247	-0.27357	0.15666	-0.33665	0.12727	0.02558	-0.52333
OFAVBQ_DN113413_c0_g1_i1	0.39981	0.14851	-0.20112	-0.04318	0.15055	0.05625	0.16275	-0.22171	-0.29842	-0.03088	-0.05358	0.2524	-0.16966	0.18635	0.00955	0.67389	OFAVBQ_DN113909_c0_g1_i1	0.07598	0.48432	0.26914	0.09505	0.13452	0.64924	-0.46582	-0.02372	-0.06502	-0.12508	-0.03417
OFAVBQ_DN223604_c1_g1_i2	0.25641	0.09478	0.27583	0.00182	-0.13780	0.40379	-0.34316	-0.37994	0.31152	0.44876	-0.15917	-0.11383	-0.19311	0.07017	0.16062	-0.01742	OFAVBQ_DN113413_c0_g1_i1	0.45458	0.12687	-0.14542	0.32948	-0.02727	-0.08821	0.04791	0.12001	-0.65638	0.40374	-0.16878
SYMBOF_DN99941_c0_g1_i1	0.22946	-0.18866	0.49476	-0.08470	0.07181	0.07338	0.12003	0.01959	-0.08336	0.03643	0.46101	0.08749	0.1134	-0.60059	0.07164	0.16521	OFAVBQ_DN223604_c1_g1_i2	0.31245	0.15518	-0.14927	-0.45374	0.32328	-0.33351	-0.35993	0.46242	0.01168	-0.09062	0.28752
SYMBOF_DN75265_c0_g1_i2	-0.09242	0.44354	0.32116	-0.06813	-0.09354	-0.16716	0.35977	0.14074	-0.14498	0.16434	-0.55619	-0.15869	0.15657	-0.19475	0.21825	0.09155
SYMBOF_DN66880_c0_g1_i1	0.21746	-0.00791	0.45926	-0.05158	0.31396	-0.23769	-0.20640	-0.08323	-0.19142	-0.21055	0.03757	0.03212	0.30335	0.5151	0.23662	-0.19423
SYMBOF_DN174588_c0_g1_i1	0.39694	0.14704	-0.17137	-0.08415	0.20473	0.01332	0.14099	-0.12716	-0.38477	0.20527	-0.06116	0.04715	-0.13762	-0.17709	-0.29154	-0.61221
SYMBOF_DN115963_c0_g1_i1	0.26774	0.07115	-0.02438	-0.29933	-0.04193	-0.45886	-0.14361	0.47889	0.26437	0.45609	0.14162	0.06414	-0.04485	0.13875	-0.18369	0.11708

## Sheet: MDS
Multi-dimensional scaling (MDS) plot of raw iTRAR protein concentration data (first two dimensions only). Data were derived from 16 holobiont proteins (left), 11 host coral proteins (middle), or 5 endosymbiont proteins.
Icons have been coded by the respective sample's colony health designation: bleaching-resistant (BLR; green), intermediate (INT; blue), or bleaching-susceptible (BLS; red).
Holobiont: stress=0.09					Host coral: stress=0.07					Endosymbiont: stress=0.08
Dimension 1	Dimension 2	Dimension 3	Dimension 4		Dimension 1	Dimension 2	Dimension 3	Dimension 4		Dimension 1	Dimension 2	Dimension 3
-0.162298	-0.124786	0.0201061	-0.00939267		-0.191525	-0.0675257	-0.11501	-0.132422		-0.0716093	-0.130689	0.0858854
-0.204677	-0.279694	-0.358604	0.0368516		-0.275625	-0.1963	0.227405	0.321032		-0.392994	-0.164026	0.123017
0.0882078	-0.00878723	0.303732	-0.137906		0.0938508	-0.0145489	-0.31207	0.10889		-0.0557526	0.300363	0.132584
0.0547891	-0.0324271	0.456711	0.0367598		0.0509736	-0.135889	-0.439447	0.102305		0.199827	0.3317	0.205505
-0.0102712	-0.134828	0.25523	-0.0710319		-0.00718603	-0.141616	-0.24535	0.00424583		-0.0508408	0.160604	0.255012
0.12007	0.21878	0.397029	-0.0248192		0.15804	0.13369	-0.411887	-0.0112998		0.375713	0.282177	-0.0366307
-0.303198	0.0472168	-0.112388	-0.0223197		-0.334625	0.109826	0.0814802	-0.136919		0.00478016	-0.137463	-0.0157952
-0.295699	-0.103971	0.0573846	0.0973048		-0.353429	-0.176393	-0.0199623	-0.0505994		0.112718	-0.0295382	0.0251294
-0.194619	0.0909793	0.110498	0.0245282		-0.219433	0.0281388	0.00905756	0.0452698		0.18726	0.183338	-0.0250929
-0.219243	0.231906	-0.140111	-0.0921797		-0.214733	0.316815	0.151292	-0.0559291		0.0173967	0.0439179	-0.126717
-0.140378	0.210369	-0.132386	0.0561051		-0.1406	0.210185	0.184947	0.0695831		0.141876	-0.0157619	-0.124897
-0.231026	0.246867	0.0973967	-0.0934618		-0.238203	0.182885	-0.00906241	-0.0180053		0.0878338	0.329996	-0.287238
-0.112408	-0.212152	0.00649376	-0.135932		-0.0910888	-0.163048	-0.0313788	-0.247958		-0.166178	0.00213069	-0.0832479
-0.0498001	-0.222751	0.0731773	0.198358		-0.0656208	-0.247277	0.0066045	-0.105769		0.296496	-0.0862147	0.266474
-0.0132521	-0.162614	-0.125327	0.308531		-0.0453729	-0.281375	0.294144	0.0307216		0.191015	-0.154338	0.138286
0.261056	-0.354717	-0.0279044	-0.0292319		0.308279	-0.317937	0.104966	0.120886		-0.266836	0.167409	0.180205
0.525157	-0.246512	-0.0320659	0.0447144		0.611834	-0.274961	0.133787	-0.113719		-0.0518004	0.0338938	0.0233033
0.377796	-0.2705	0.0442436	-0.233508		0.447512	-0.302711	-0.0775597	-0.135201		-0.30748	0.235753	0.00902514
-0.121478	0.0588348	-0.209465	-0.0975228		-0.121965	0.131298	0.167641	-0.151588		-0.136439	-0.136718	-0.124575
-0.166432	-0.0602813	-0.0571818	0.225005		-0.20593	-0.155179	0.140562	-0.00856594		0.282429	-0.130935	0.0598664
-0.0866055	-0.042698	-0.0319163	-0.158598		-0.0722063	0.0175493	0.0261506	-0.0198331		-0.223818	-0.0397447	0.0156745
-0.177215	0.187275	-0.144616	-0.176219		-0.141755	0.277436	0.121758	-0.167137		-0.0114503	0.0118867	-0.215912
0.000960584	-0.0450139	-0.167738	-0.174322		0.0300037	0.0882165	0.134603	-0.183039		-0.234986	-0.0104793	0.0586942
-0.0894606	-0.0577441	-0.0555001	-0.331889		-0.0513688	0.136865	-0.0610592	-0.267684		-0.373579	-0.0382066	0.0999366
-0.299962	-0.0521138	0.124706	0.272869		-0.355977	-0.12933	-0.106995	0.115717		0.125365	-0.379869	0.226199
1.31546	0.229023	-0.140031	0.118919		1.57406	0.247432	0.119748	0.0475746		-0.0454739	-0.0339148	-0.388034
0.156639	0.168606	-0.160151	0.0647644		0.133574	0.213112	0.0559651	0.238404		-0.110192	-0.0736202	-0.0924157
0.0565735	0.217208	-0.00317135	0.0832952		-0.0551217	0.147277	-0.0995571	0.253465		-0.0373123	-0.173556	-0.0881973
0.0454553	0.305167	-0.0385496	-0.168906		-0.0684213	0.32696	-0.194591	0.0401962		-0.0343722	-0.189553	-0.254964
-0.124144	0.19936	-0.00960091	0.389236		-0.15794	0.0364067	0.163818	0.307376		0.548403	-0.158544	-0.0410803

## Sheet: PLS
Partial least squares correlation loading plot with samples marked according to their colony health designations: bleaching-resistant (BLR; green), intermediate (INT; blue), or bleaching-susceptible (BLS; red).
Note that only 13 samples have been shown since this analysis featured the training data only.
	variable importance plot

## Sheet: discriminant
Discriminant analysis of 16 proteins vs. four fragment health designations: healthy control (HC; green), actively bleaching (AB; red), high-temperature-acclimating (HTA; blue), and sub-lethally stressed (SLS; orange)
Total Canonical Structure
	Protein data were standardized prior to analysis.
	Standardize[OFAVBQ_DN222422_c2_g1_i4]	Standardize[OFAVBQ_DN204090_c1_g1_i1]	Standardize[OFAVBQ_DN221212_c1_g1_i1]	Standardize[OFAVBQ_DN221258_c1_g2_i8]	Standardize[OFAVBQ_DN220189_c1_g1_i3]	Standardize[OFAVBQ_DN153972_c0_g1_i1]	Standardize[OFAVBQ_DN214371_c5_g2_i1]	Standardize[OFAVBQ_DN208218_c2_g1_i13]	Standardize[OFAVBQ_DN113909_c0_g1_i1]	Standardize[OFAVBQ_DN113413_c0_g1_i1]	Standardize[OFAVBQ_DN223604_c1_g1_i2]	Standardize[SYMBOF_DN99941_c0_g1_i1]	Standardize[SYMBOF_DN75265_c0_g1_i2]	Standardize[SYMBOF_DN66880_c0_g1_i1]	Standardize[SYMBOF_DN174588_c0_g1_i1]	Standardize[SYMBOF_DN115963_c0_g1_i1]
Canon1	-0.043279	0.234633	-0.564618	0.0167476	0.529297	0.459991	-0.129009	0.39203	-0.008766	0.319333	0.812591	0.374031	0.244068	0.187134	0.305618	0.227039
Canon2	-0.256356	-0.06178	0.152602	0.114719	-0.152146	-0.153628	-0.057161	-0.022498	0.210649	0.0443416	0.0179406	-0.334392	-0.044101	-0.033121	0.149522	-0.252541
Canon3	0.0799435	0.183504	0.349359	0.288286	0.135303	0.29707	0.130499	0.0823724	0.518455	0.312843	0.237386	-0.217685	-0.180457	-0.348057	0.292743	0.113403
Score Summaries
Source	Count	Number Misclassified	Percent Misclassified	Entropy RSquare	-2LogLikelihood
Training	30	0	0	0.93439	4.37903
Training
Actual	Predicted Count
FHD	AB	HC	HTA	SLS
AB	4	0	0	0
HC	0	18	0	0
HTA	0	0	4	0
SLS	0	0	0	4
Actual	Predicted Rate
FHD	AB	HC	HTA	SLS
AB	1	0	0	0
HC	0	1	0	0
HTA	0	0	1	0
SLS	0	0	0	1

## Sheet: models
Abbreviations: CHD=colony health designation, field=derived from in situ samples, gen-reg=generalized regression, HL=hidden layer, lab=derived from laboratory study, NA=not applicable, NN=neural network, QC=quality control, TE=test samples, TR=training samples, V=validation samples								green=passed QC (accuracy>80%)	red=failed QC (accuracy<80%)			verified on 11-29-22	verified on 11-29-22
Model full name	CHD-lab==>CHD-lab [15]		CHD-lab==>CHD-field(a)	CHD-lab==>CHD-field(b)	CHD-lab==>CHD-field(c)	CHD-lab==>CHD-field(d)		CHD-lab+field==>CHD-lab+field(a)	CHD-lab+ field==>CHD-lab+field(b)	CHD-lab+field==>CHD-lab+field(c)	CHD-lab+field=>CHD-lab+field(d)	CHD-lab+field==>CHD-lab+field(e)	CHD-lab+field==>CHD-lab+field(f)	CHD-lab+field==>CHD-lab+field(g)	CHD-lab+field==>CHD-lab+field(h)	CHD-lab+field==>CHD-lab+field(i)		CHD-field==>CHD-field(a)	CHD-field==>CHD-field(b)	CHD-field==>CHD-field(c)	CHD-field==>CHD-field(d) (aka July==>August(a))	CHD-field==>CHD-field(e) (aka July==>August(b))	CHD-field==>CHD-field(f)	CHD-field==>CHD-field(g)	July data only(a)	July data only(b)	July data only(c)
Model prediction goal	CHD-lab		CHD-field	CHD-field	CHD-field	CHD-field		CHD-lab+field	CHD-lab+field	CHD-lab+field	CHD-lab+field	CHD-lab+field	CHD-lab+field	CHD-lab+field	CHD-lab+field	CHD-lab+field		CHD-field	CHD-field	CHD-field	CHD-field	CHD-field	CHD-field	CHD-field	CHD-field	CHD-field	CHD-field
Total sample size	19		31	31	43	43		31	31	43	43	43	37	49	43	31		30	30	18	24	24	24	30	12	12	12
Validation column name	Validation (14TR+5V)		Validation 7 (19TR+12V)	Validation 2 (14TR+5V+12TE)	Validation 7 (19TR+24V)	Validation 3 (19TR+12V+12TE)		Validation 5 (23-6-2)	Validation 4 (22-6-3)	30% holdback (28)	20% holdback (33)	Validation (30-10-3)	Validation 5 (25-9-3)	Validation 2 (43-6 [all Dec.])	Validation 3 (28-10-5)	Validation 2 (20-8-3)		Validation 19 8 3	Validation 3 (18T+12V-Aug)	Validation 4 (11-4-3)	Validation 4 (9T+3V-Jul.+12T-Aug.)	Validation 2 (12TR-Jul.+12V-Aug.)	Validation 3 (15-6-3)	Validation 5 (13-5-12)	Kfold5	Validation (9T-3V)	20% holdback
Training data (# samples)	Lab (14)		Lab (19)	Lab (14)	Lab (19)	Lab (19)		Lab (15)+field (8)	Lab (13)+field (9)	Random (15)	Random (10)	Lab (16)+field (14)	Lab (11)+field (14)	Lab (19)+field (24)	Lab (12)+field (16)	Lab (13)+field (7)		Field (19)	Field (18)	Field (11)	Field (9)	Field (12)	Field (15)	Field (13)	Field (10)	Field (9)	Field (9)
Training data-months	NA		NA	NA	NA	NA		Lab & Jul.	Lab & Jul.	Lab+all field	Lab+all field	Lab, Jul., & Aug.	Lab, Jul., & Dec.	Lab, Jul., & Dec.	Lab., Jul., & Aug.	Lab & Jul.		Jul., Aug., Dec.	Jul. & Dec.	Jul. & Dec.	Jul. (9)	Jul. (12)	Jul. & Aug.	Jul. & Dec.	Jul.	Jul.	Jul.
Validation data (# samples)	Lab (5)		Field (12)	Lab (5)	Field (24)	Field (12)		Lab (3)+field (3)	Lab (4)+field (2)	NA	NA	Lab (1)+field (9)	Lab (7)+field (2)	Field (6)	Lab (4)+field (6)	Lab (4)+field (2)		Field (8)	Field (12)	Field (4)	Field (3)	Field (12)	Field (6)	Field (5)	Field (2)	Field (3)	Field (3)
Validation data-months	NA		Jul. (12)	NA	Jul. (12) & Aug. (12)	Jul. (12)		Lab & Jul.	Lab & Jul.	Lab, Jul., & Aug.	Lab, Jul., & Aug.	Lab, Jul., & Aug.	Lab, Jul., & Dec.	Dec.	Lab., Jul., & Aug.	Lab & Jul.		Jul., Aug., Dec.	Aug. (12)	Jul. & Dec.	Jul. (3)	Aug. (12)	Jul. & Aug.	Jul. & Dec.	Jul.	Jul.	Jul.
Test data (# samples)	0		NA	Field (12)	NA	Field (12)		Lab (1)+field (1)	Lab (2)+field (1)	NA	NA	Lab (2)+field (1)	Lab (1)+field (2)	NA	Lab (3)+field (2)	Lab (2)+field (1)		Field (3)	NA	Field (3)	Field (12)	NA	Field (3)	Field (12)	NA	NA	NA
Test data-months	NA		NA	Jul. (12)	NA	Aug. (12)		Lab & Jul.	Lab & Jul.	NA	NA	Lab. (1) & Aug. (1)	Lab, Jul., & Dec.	NA	Lab., Jul., & Aug.	Lab & Jul.		Jul., Aug., Dec.	NA	Jul. & Dec.	Aug. (12)	NA	Jul. & Aug.	Aug. (12)	NA	NA	NA
Training proteins (#)	86		5	5	4	4		5	5	4	4	4	2	2	4	5		16	16	16	28	28	28	16	65	65	65
Model type#1: accuracy (# runs)	NN: 100±1% (n=20)		NN: 86±10% (n=40)	NN: 70±8% (n=20)	NN: 82±7% (n=40)	NN: 75±8% (n=20)		NN: 95±10% (n=20)	NN: 94±10% (n=20)	Support vector machine: 82±3.5% (n=20)	Gen-reg elastic net: 76±8% (n=20)	Support vector machine: 86%	Bootstrap forest: 86.5%	NN: 98±5%	Nominal logistic: 81%	NN: 85±12% (n=20)		Support vector machine: 90% (inc. TR samples)	Naives Bayes: 94%	Gen-reg lasso: 95%	Gen-reg-ridge: 92%	NN: 95±6% (n=20)	Support vector machine: 94%	Nominal logistic: 90%	Discriminant: 100%	NN: 93±9% (n=20)	NA
Model type#2: accuracy (# runs)	Gen-reg-ridge: 100%		NN only	NN only	NN only	NN only		Support vector machine: 87%	Bootstrap forest: 78±5% (n=20)	NN: 82±12% (n=20)	NN: 76±2% (n=60)	NN: 65±4%	NN: 15±1%	Naïve Bayes: 84%	NN: 68±9%	NN only		NN: 84±9% (n=40)	NN: 87±13 (n=40)	NN: 87±14 (n=20)	NN: 86±10 (n=40)	Naïve Bayes: 92%	NN: 79±11 (n=20)	NN: 77±9 (n=20)		Support vector machine: 92%	NQ
NN structure	TanH(3)		TanH(1)-Linear(1)-Gaussian(3)	NA: no model passed QC	TanH(2)-Linear(2)-Gaussian(3)	NA: no model passed QC		TanH(1)-Gaussian(4)-Boost(1)	TanH(3)-Linear(1)-Gaussian(1)-Boost(20)	TanH(1)-Gaussian(4)-Boost(5)	NA: no model passed QC	NA: no model passed QC	NA: no model passed QC	TanH(1)-Linear(3)-Gaussian(3)-Boost(2)	NA: no model passed QC	Gaussian(3)-Boost(1)		Linear(1)-Gaussian(4)-Boost(1)	TanH(1)-Linear(1)-Gaussian(2)-Boost(14)	Linear(1)-Gaussian(3)-Boost(2)	TanH(1)-Gaussian(3)-Boost(4)	Gaussian(2)-Boost(19)	NA: no model passed QC	NA: no model passed QC		Linear(1)-Gaussian(2)	NA: no model passed QC
NN script name	Neural of CHD-lab 14T-5V accuracy=100%		Neural of CHD 19T 12 V accuracy = 86%	NA: no model passed QC	Neural of CHD 19T 24 V accuracy=82%	NA: no model passed QC		Neural of CHD 23T-6V-2T accuracy=95%	Neural of CHD 22T-6V-3TE accuracy=94%	Neural of CHD 30% HB accuracy=82%	NA: no model passed QC	NA: no model passed QC	NA: no model passed QC	Neural of CHD 43T-6V accuracy=98%	NA: no model passed QC	Neural of CHD 20-8-3 accuracy=85%		Neural of CHD-field 19-8-3 accuracy=84%	Neural of CHD-field 18TR-12V accuracy=87%	Neural of CHD-field 11-4-3 (no Aug.) accuracy=87%	Neural of CHD 9-3-12 accuracy=86%	Neural of CHD 12-Jul. T-12-Aug. val accuracy=95%	NA: no model passed QC	NA: no model passed QC		Neural of CHD 9T+3V accuracy=93%	NA: no model passed QC
Other script name	Generalized Regression for CHD-lab = BLS							Support Vector Machines of CHD 23-6-2 accuracy=87%	Bootstrap Forest of CHD 22T-6V-3T accuracy=78%	Support Vector Machines of CHD 30% HB accuracy=82%	Generalized Regression elastic net 20% HB accuracy=76%	Support Vector Machines of CHD 30T-10V-3T accuracy=86%	Bootstrap Forest of CHD 25-9-3 accuracy=86%	Naive Bayes of CHD 43T-6V accuracy=84%	Fit Nominal Logistic of CHD 28-10-5 accuracy=81%			Support Vector Machines of CHD-field 19-8-3 accuracy=90%	Naïve Bayes of CHD-field 18-12 accuracy=94%	Generalized Regression-lasso of CHD-field 11-4-3 accuracy=95%	Generalized Regression of CHD 9-3-12 accuracy=92%	Naive Bayes of CHD July as training accuracy=92%	Support vector machine of CHD 15-6-3 accuracy=94%	Fit Nominal Logistic of CHD-field 13-5-12 accuracy=90%	Discriminant of July CHD accuracy=100%	Support Vector Machines of CHD 9T+3V accuracy=92%	NA: no model passed QC
Figure/table/notes/most important predictor	Table 3 & Figure 4b		Table 3 & Figure 4d	NA: no model passed QC	Table 3	NA: no model passed QC			OFAVBQ_DN207472_c1_g1_i1			Consider plotting						Table 4		others at 95%		Table 5	consider plotting
input data file name	CHD-lab subset (n=19 samples)		CHD-lab to CHD-field	CHD-lab to CHD-field	CHD-lab to CHD-field	CHD-lab to CHD-field		CHD-lab to CHD-field	CHD-lab to CHD-field	CHD-lab to CHD-field		CHD-lab+field 50 rows	CHD-lab+field 50 rows	CHD-lab+field 50 rows	CHD-lab+field 50 rows	lab+field corals n=49		Host+Sym in all 30 samples (for manuscript)	Host+Sym in all 30 samples (for manuscript)	Host+Sym in all 30 samples (for manuscript)	Host coral July and August proteins (n=28).jmp	Host coral July and August proteins (n=28).jmp	Host coral July and August proteins (n=28).jmp		host July proteins only (n=65)	host July proteins only (n=65)
worksheet name	CHD-lab subset		CHD-lab to field							CHD-lab to field		CHD-lab to field (50)	CHD-lab to field (50)	CHD-lab to field (50)	CHD-lab to field (50)			16 field proteins	16 field proteins	16 field proteins		Jul-Aug
output file name#1 (for NN GUIs)	CHD-lab to CHD-lab 14T-5V HL1 (n=3,000)		CHD-lab to CHD-field 19T-12V HL1 (n=1,000)	CHD-lab to CHD-field 14T-5V-12T HL1 (n=1,000)	CHD-lab to CHD-field 19T-24V HL1 (n=1,000)	CHD-lab to CHD-field 19T-12V-12T HL1 (n=1,000)		CHD-lab+field to CHD-lab+field 23T-6V-2T HL1 (n=1,000)	CHD-lab to CHD-field 22-6-3 HL1 (n=1,000)	CHD-lab+field to CHD-lab+field 30% HB HL1 (n=1,000)	CHD-lab+field to CHD-lab+field 20% HB HL1 (n=5,000)	CHD-lab+field to CHD-lab+field 30-10-3 HL1 (n=1,000)	CHD-lab+field to CHD-lab+field 25-9-3 HL1 (n=1,000)	CHD-lab+field to CHD-lab+field 43-6 HL1 (n=1,000)	CHD-lab+field to CHD-lab+field 28-10-5 HL1 (n=1,000)			CHD-field to CHD-field 19-8-3 HL1 (n=5,000)	CHD-field to CHD-field 18T-12V (Aug) HL1 (n=1,000)	CHD-field to CHD-field 11-4-3 (no Aug.) HL1 (n=1,000)	July for August CHD 9-3-12 HL1 (n=1,000)	CHD-field to CHD-field 12T+12V HL1 (n=1,000)	CHD-field to CHD-field Jul. and Aug. 15-6-3 HL1 (n=1,000)	Jul. & Dec. to Aug. 13-5-12 HL1 (n=1,000)		CHD-field July only 9T+3V HL1 (n=1,000)	CHD-field July only 20% HB HL1 (n=1,000)
output file name#2									CHD-lab to CHD-field 22-6-3 HL2 (n=1,000)				CHD-lab+field to CHD-lab+field 25-9-3 HL2 (n=1,000)		CHD-lab+field to CHD-lab+field 28-10-5 HL2 (n=1,000)
					6.60225													12.023		calculated from all 18 samples	calculated from validation and test samples only (n=15)		calculated from validation and test samples only	calculated from validation and test samples only		included training data in misclass rate calc	included training data in misclass rate calc
model#1 details	HL1: best model from 3,000 (n=20 runs)		HL1: best model from 1,000 (n=20 runs)	HL1: best model from 1,000 (n=20 runs)	HL1: best model from 1,000 (n=20 runs)	HL1: best model from 1,000 (n=20 runs)		accuracy with test samples only	HL1: best model from 1,000 (n=20 runs)	HL1: best model from 1,000 (n=20 runs)	HL1: best model from 1,000 (n=20 runs)	HL1: best model from 1,000 (n=20 runs)	HL1: best model from 1,000 (n=20 runs)	HL1: best model from 1,000 (n=20 runs)	HL1: best model from 1,000 (n=20 runs)	ran script above 10 times		combined misclassification rates for validation & test data (HL1)	HL1: best model from 1,000 (n=20 runs)	HL1: best model from 1,000 (n=20 runs)	HL1: best model from 1,000 (n=20 runs)	HL1: best model from 1,000 (n=20 runs)	HL1: best model from 1,000 (n=20 runs)	HL1: best model from 1,000 (n=20 runs)		HL1: best model from 1,000 (n=20 runs)	HL1: best model from 1,000 (n=20 runs)
std. dev. accuracy	1.11803		5.46857	7.73849	5.12502	8.14652		11.1803	16.9286	11.7315	8.12728	16.4396	22.8875	5.23249	6.15587	12.3607		8.51315	13.5749	11.8097	10.3576	6.32851	10.9855	8.91673	NA: used kfold validation	8.85126	12.0895
mean accuracy	99.75		94.3	70.1	83.65	75.45		97.5	83.5	82.45	73.5	61.95	14.95	98.3	62	85.45		86.5	85.0833	86.7667	81.4667	95.05	78.55	77.0029	NA: used kfold validation	93.35	71.95
1	100		92	67	79	83		100	67	93	70	67	33	100	60	100		82	67	67	67	83	67	76		92	100
2	100		92	67	79	100		100	100	87	80	0	67	100	80	84		91	91.6667	94.4444	93.3333	92	67	94.1176		100	100
3	100		100	75	87.5	75		100	100	87	80	67	0	100	60	100		82	100	88.8889	93.3333	100	89	65		100	100
4	100		92	58	87.5	67		100	67	67	70	67	0	100	60	97		91	92	94	86.6667	100	89	76		100	67
5	95		100	83	79	75		100	67	67	70	67	0	100	60	74		91	83	94	86.6667	100	89	88.2353		100	67
6	100		92	50	92	75		100	67	67	70	67	0	83	60	81		91	100	67	86.6667	100	78	76.4706		100	67
7	100		92	75	83	67		100	100	87	70	67	0	100	80	94		91	67	94	67	92	89	82.3529		100	67
8	100		92	75	83	75		100	67	67	70	67	0	100	60	84		100	83	94	86.6667	92	89	70.5882		100	67
9	100		100	75	83	83		100	100	93	70	67	33	100	60	68		91	100	89	67	100	89	82.3529		75	67
10	100		100	75	87.5	75		50	100	93	70	67	0	100	60	68		82	83	94	87	83	89	82.3529		75	67
11	100		100	67	87.5	75		100	67	67	70	67	33	100	60	97		73	67	94	67	100	67	82.3529		83	67
12	100		83	67	79	83		100	67	80	70	67	0	100	60	68		91	92	67	87	83	67	76.4706		100	67
13	100		100	75	79	67		100	100	67	70	67	67	83	60	90		73	100	94	87	92	67	64.7059		100	67
14	100		92	67	71	67		100	100	80	70	67	33	100	60	94		91	67	94	80	92	89	64.7059		100	67
15	100		92	75	92	75		100	100	93	70	67	0	100	60	68		73	92	94	67	100	89	82.3529		92	67
16	100		83	67	87.5	75		100	67	100	90	67	0	100	60	100		73	100	94	80	100	67	82.3529		83	67
17	100		100	67	87.5	83		100	67	87	70	67	0	100	60	90		100	67	94	93	92	67	64.7059		100	67
18	100		92	83	83	67		100	67	100	70	67	33	100	60	97		91	100	94	67	100	89	76		92	67
19	100		100	67	83	75		100	100	87	100	67	0	100	60	87		91	83	67	93	100	67	64.7059		92	67
20	100		92	67	83	67		100	100	80	70	33	0	100	60	68		82	67	67	87	100	67	88.2353		83	67
model#2 details			re-calculated accuracy across all samples		re-calculated accuracy across all 43 samples			accuracy with validation samples only	HL2: best model from 1,000 (n=20 runs)	Support vector machines (re-ran with 20 subsets of 30% of samples held back)	HL1: 2nd best model from 1,000 (n=20 runs)	HL1: 2nd best model from 1,000 (n=20 runs)	HL1: 2nd best model from 1,000 (n=20 runs)		HL1: 2nd best model from 1,000 (n=20 runs)			re-calculated accuracy across all 30 samples	re-calculated accuracy across all 30 samples		calculated from all 24 samples						HL1: best model from 1,000 (n=20 runs)
stdev			8		7			9	12	3	10	0	23		11			14.6409	11		8						13
mean			78		80			91	72	82	76	67	15		65			82.1667	89		90						74
1			71		77			83	67	77	70	67	67		60			66.6667	90		96						67
2			87		77			83	67	84	70	67	33		60			66.6667	93.3333		92						67
3			81		81			83	67	74	70	67	33		60			86.6667	96.6667		88						67
4			87		79			100	100	81	70	67	0		80			96.6667	96.6667		88						100
5			90		86			100	67	81	70	67	0		60			100	93.3333		88						92
6			87		79			83	67	81	70	67	33		60			90	93.3333		67						100
7			74		67			83	100	79	80	67	0		80			66.6667	67		67						67
8			77		77			100	100	77	100	67	0		60			66.6667	93.3333		96						92
9			77		95			100	67	84	90	67	0		60			96.6667	100		88						67
10			61		77			100	67	86	70	67	67		60			66.6667	96.6667		96						67
11			65		74			100	67	81	100	67	33		60			96.6667	93		96						67
12			74		91			83	67	84	80	67	0		80			66.6667	93		88						67
13			87		77			100	67	77	70	67	0		100			66.6667	67		96						67
14			81		72			83	67	84	70	67	33		60			96.6667	93		92						67
15			74		91			83	67	86	70	67	0		60			96.6667	97		96						67
16			77		79			83	67	81	70	67	0		60			66.6667	67		92						67
17			77		74			83	67	84	90	67	0		60			66.6667	86.6667		92						67
18			74		70			83	67	84	70	67	0		60			96.6667	93		96						100
19			77		86			100	67	86	70	67	0		60			93.3333	97		96						67
20			87		88			100	67	81	70	67	0		60			93.3333	67		92						67
model#3 details									20 simulations of the bootstrap forest	20 additional simulations of superior NN using all data for accuracy calculation	HL1: 3rd best model from 1,000 (n=20 runs)		HL2: 1st best model from 1,000 (n=20 runs)		HL2: 1st best model from 1,000 (n=20 runs)
stdev									4.73101	4.2112	11.7429		28.5325		20.4167
mean									78.3887	76.8605	77		30		78
1									77.4194	8	80		0		60
2									80.6452	14	90		67		100
3									80.6452	14	70		33		100
4									74.1935	5	100		0		100
5									83.871	14	70		67		100
6									81	14	70		33		60
7									71	4	70		0		60
8									77	14	70		0		100
9									77	8	70		0		60
10									77	6	70		33		100
11									68	10	60		33		40
12									84	4	70		0		60
13									81	8	90		67		80
14									77	2	90		33		60
15									87	14	70		67		60
16									81	10	70		0		80
17									77	14	90		67		100
18									81	14	70		33		60
19									81	8	100		0		80
20									71	14	70		67		100
model#4 details									NN: HL1: 3-1-1-boost 20, 100 tours		Gen-reg elastic net, SRS of 20% HB
stdev									9.48961		7.63891
mean									94.5		75.5814
1									68		81.3953
2									97		86.0465
3									100		83.7209
4									100		69.7674
5									100		83.7209
6									97		83.7209
7									100		69.7674
8									97		81.3953
9									97		67.4419
10									97		67.4419
11									97		67.4419
12									100		72.093
13									97		67.4419
14									97		81.3953
15									97		67.4419
16									68		79.0698
17									97		67.4419
18									87		81.3953
19									100		86.0465
20									97		67.4419

## Sheet: CHD-lab subset
	CHD=colony health designation, BLS=bleaching-susceptible, BLR=bleaching-resistant												standardized protein concentration data
sample	CHD-lab	site	shelf	temperature	temperature-control vs. high	treatment (temp. x time)	genotype	colony code	genotype x colony code	Symbiodiniaceae assemblage	day	Validation	OFAVBQ_DN190522_c0_g2_i1 2	OFAVBQ_DN197447_c0_g1_i1	OFAVBQ_DN200173_c1_g1_i3 2	OFAVBQ_DN207472_c1_g1_i1 2	OFAVBQ_DN208218_c2_g1_i13 2	OFAVBQ_DN208635_c1_g2_i15 2	OFAVBQ_DN217378_c2_g1_i3 2	OFAVBQ_DN217768_c1_g1_i5 2	OFAVBQ_DN218151_c4_g1_i1 2	OFAVBQ_DN218976_c2_g3_i2 2	OFAVBQ_DN219538_c0_g1_i8 2	OFAVBQ_DN220419_c0_g1_i1 2	OFAVBQ_DN220422_c1_g2_i1 2	OFAVBQ_DN221955_c1_g1_i6 2	OFAVBQ_DN222105_c0_g1_i1 2	OFAVBQ_DN222214_c0_g2_i2 2	OFAVBQ_DN222422_c2_g1_i4 2	OFAVBQ_DN222591_c0_g1_i4 2	OFAVBQ_DN223327_c1_g3_i5 2	OFAVBQ_DN223381_c0_g1_i7 2	OFAVBQ_DN223482_c3_g2_i3 2	OFAVBQ_DN223562_c2_g1_i4 2	OFAVBQ_DN223611_c1_g1_i7 2	OFAVBQ_DN223630_c2_g1_i3 2	OFAVBQ_DN223651_c2_g2_i5 2	OFAVBQ_DN223859_c0_g3_i6 2	OFAVBQ_DN224050_c2_g4_i1 2	OFAVBQ_DN224213_c1_g2_i4 2	OFAVBQ_DN224470_c0_g1_i6 2	OFAVBQ_DN224692_c1_g1_i3 2	OFAVBQ_DN224718_c1_g1_i7 2	OFAVBQ_DN224723_c4_g1_i2 2	OFAVBQ_DN224814_c0_g1_i1 2	OFAVBQ_DN224866_c2_g1_i3 2	OFAVBQ_DN224963_c0_g1_i1 2	OFAVBQ_DN225086_c0_g1_i2 2	OFAVBQ_DN225239_c1_g1_i3 2
C5-1	BLS	Little Conch	offshore	30	control	30-5	black(a)	C5	C	mostly Breviolum	5	Training	0.137504	-0.132894	-0.187707	0.422233	0.0426443	0.727703	-0.516636	-0.657445	0.0786098	0.703101	0.793272	0.304511	-0.192645	0.0976108	-2.25843	0.282143	-0.184425	-2.4112	-1.92687	0.668119	-0.318326	0.207893	-0.195946	1.14405	-1.35476	0.312665	0.467801	-0.046921	0.583038	0.853597	0.286881	-0.210897	-0.510457	0.386259	0.73292	0.051024	-0.415037
B5-4	BLR	Cheeca Rocks	inshore	33	high	33-5	lightyellow	B5	B	mostly Breviolum	5	Training	-0.428566	0.789103	-0.625934	0.503858	0.895303	0.442545	-0.715486	-0.013043	0.120352	-0.288065	-0.0232698	-0.189351	0.0186342	-0.100051	1.52457	-0.0439433	-0.265345	-1.22769	-1.85726	0.0894982	-0.00723157	0.263034	-0.0335695	1.08474	-1.4112	-0.0247367	-0.0174171	0.367371	-0.320126	-0.713119	0.532068	0.621993	-0.212568	0.0962619	0.244887	-0.0694519	0.634129
A2-2	BLS	The Rocks	inshore	30	control	30-31	skyblue	A2	A	mostly Durusdinium	31	Training	-0.53952	-0.951764	1.39835	0.553852	0.16221	0.541019	1.06143	0.827006	0.423309	-0.888969	0.471968	0.396159	0.559737	0.158337	-0.818579	-0.304006	-0.202572	-3.60823	-1.61264	0.557778	-0.401635	0.524064	-0.131313	-0.500218	-0.606035	-0.106249	0.448901	-0.00144342	0.379621	-0.883635	0.713696	-0.0174171	-0.15682	-0.103147	0.889084	0.531069	0.425459
A4-5	BLR	The Rocks	inshore	32	high	32-31	skyblue	A4	A	mostly Durusdinium	31	Training	0.175045	-2.04692	-0.634867	0.696884	1.18078	1.14012	-0.0174171	-0.606035	0.909965	-0.136062	-0.785875	0.0370307	0.742437	0.642471	-1.87303	-0.0218044	-1.23447	-2.191	-1.20423	0.771463	-0.384584	0.815575	-0.841663	1.26604	-1.64386	0.766383	0.769772	0.801573	-0.28279	-0.798366	-0.327348	-0.00144342	0.258217	-0.403542	1.34085	0.228973	-0.341903
B3-1	BLR	Cheeca Rocks	inshore	32	high	32-31	black(c)	B3	B	mostly Breviolum	31	Training	-0.347399	-1.37707	-0.272297	0.653519	0.488515	0.989866	0.194087	-0.741783	-0.32916	0.0257376	-0.713119	0.370722	0.653519	0.565597	-0.575615	-0.15682	-0.00578235	0.210389	-1.29336	0.570463	0.0496308	0.540027	-0.0174171	0.199123	-1.22095	-0.148801	0.641546	-0.172994	-0.027675	-0.545824	0.440421	0.372952	-0.362158	0.212881	0.910733	0.305679	-0.0603973
C5-2	BLS	Little Conch	offshore	32	high	32-31	black(a)	C5	C	mostly Durusdinium	31	Validation	0.0214797	-1.84684	-0.579922	0.0538064	0.889863	1.419	-1.11092	-0.446148	0.319618	-0.362158	-0.107803	0.196607	1.6332	0.847195	-2.17788	0.0071955	-0.657445	-3.17137	-1.9771	1.00432	-0.614845	0.980391	-0.492079	-0.0816138	-1.16488	-1.17788	1.10367	0.60027	-0.195946	-0.655172	-0.473931	-0.0513992	-0.846843	-0.186065	1.57289	-0.118727	-0.500218
A4-1	BLR	The Rocks	inshore	30	control	30-5	skyblue	A4	A	mostly Durusdinium	5	Validation	1.36849	-1.76121	1.07519	0.491597	0.629473	-0.687335	0.518031	-0.258425	-0.109359	0.0758749	0.0935602	-0.469929	0.166073	0.657183	0.0662614	-0.0679388	-0.354759	0.479231	1.15575	0.855192	-0.434403	0.360645	-0.390245	-0.077041	0.194087	-0.680382	-0.202572	0.952334	0.386259	0.371838	0.0271541	-1.96578	0.0758749	-0.00723157	0.718964	-0.375197	-0.45799
C2-2	BLS	Little Conch	offshore	30	control	30-5	black(b)	C2	C	mostly Breviolum	5	Training	0.280956	-1.85726	0.0384362	0.471968	-0.382702	-0.413115	-0.274041	-0.454032	0.311503	-0.0365259	0.797428	-0.691989	-0.147202	-0.134477	-0.210897	-0.0380063	-0.720232	-0.295128	0.0257376	-0.125006	-0.272297	0.584	-0.163268	0.317304	-0.0679388	-1.12029	-0.547932	-0.112475	0.105678	-0.571322	-0.0923402	-2.13289	0.285698	-0.251539	-0.37146	-0.675765	0.195348
D5-2	BLR	Cheeca Rocks	inshore	30	control	30-5	grey60	D5	D	mostly Breviolum	5	Validation	-0.253257	0.751892	-0.321928	-0.232769	-0.349235	-0.263612	0.43189	0.129613	0.204141	-0.140826	0.571434	-0.378944	0.138814	0.137504	0.410341	-0.00433459	-0.481969	0.0867838	-0.253257	-0.176251	0.145351	0.297485	-0.248108	0.249749	0.111031	-0.529073	-0.289827	-0.112475	-0.826233	-0.625934	0.395063	-1.67577	0.546956	-0.182786	-0.336428	-0.120294	-0.192645
A4-8	BLR	The Rocks	inshore	30	control	30-31	skyblue	A4	A	mostly Durusdinium	31	Training	0.624803	-1.79586	0.695103	0.536053	0.0676387	-0.617056	0.463622	-0.492079	0.267835	0.119024	0.0786098	-0.318326	0.9115	0.772308	-0.166503	-0.186065	-0.531156	0.511974	0.515006	0.994218	-0.411195	0.397255	-0.62371	0.596458	-0.192645	0.467801	-0.300448	1.09288	0.0172093	-0.121863	1.1137	-1.88364	0.0935602	0.0243197	-0.475936	0.0257376	-0.150401
C5-7	BLS	Little Conch	offshore	30	control	30-31	black(a)	C5	C	mostly Breviolum	31	Training	0.476122	-1.56918	-0.0724828	0.0690147	0.35727	-0.0513992	-0.305788	-0.312939	0.138814	0.107018	0.342555	-0.112475	0.324235	0.833497	-0.145605	0.117695	-1.25154	0.296311	0.197865	1.04754	-0.0619024	0.140124	-0.584241	0.606916	0.0356239	-0.434403	0.0496308	1.21226	-0.0247367	-0.311148	0.681674	-1.62593	-0.00288828	0.0271541	-0.608232	-0.352916	0.0908534
D5-3	BLR	Cheeca Rocks	inshore	32	high	32-31	grey60	D5	D	mostly Durusdinium	31	Training	0.719841	-1.67577	0.467801	0.249749	-0.288065	-0.00868224	0.635987	-0.382702	0.432959	0.0186342	0.546956	-0.336428	0.358396	0.329985	-0.341903	0.356144	-0.0320936	0.368489	0.488515	0.466758	-0.00288828	0.100305	-0.300448	-0.0174171	0.109695	-0.0985055	0.0758749	0.597412	0.486457	-0.106249	-0.0664274	-1.83136	0.0621217	0.0172093	-0.184425	-0.118727	-0.00288828
A4-7	BLR	The Rocks	inshore	33	high	33-5	skyblue	A4	A	mostly Durusdinium	5	Training	-0.246395	-1.55216	-0.756331	-0.448115	0.24245	-0.110916	0.212881	0.672652	0.757023	-1.03209	-0.0588937	-0.289827	0	0.015783	1.42223	0.181421	-0.465938	0.259423	-0.625934	-0.110916	0.286881	-0.086201	-0.182786	0.473008	0.185232	0.484396	0.195348	-0.0573917	0.46048	-0.836501	-0.0649175	0.235114	0.288063	0.0271541	-0.0499049	-0.288065	-0.336428
C5-8	BLS	Little Conch	offshore	33	high	33-5	black(a)	C5	C	mix of Breviolum & Durusdinium	5	Training	0.254594	0.426533	-0.436354	-0.12658	-0.184425	-0.12658	-0.641604	-0.41889	0.411426	1.02574	-0.318326	0.289244	0.0342157	1.43029	-0.988504	-0.011588	-0.891643	-0.0816138	-0.678072	1.42169	-0.343732	-0.279284	-0.459973	0.407081	0.077243	0.340277	-0.118727	0.183963	0.461529	-0.761213	-0.606035	0.350497	0.0922074	0.173767	0.215368	0.328836	-0.112475
D5-5	BLR	Cheeca Rocks	inshore	33	high	33-5	grey60	D5	D	mostly Breviolum	5	Training	0.0840643	-1.25154	-0.293359	-0.104697	0.175045	-0.0603973	0.238787	-0.332789	0.403813	0.121679	-0.0394883	0.077243	0.147958	1.05797	-1.34008	0.00575927	-0.345564	0.452068	-0.311148	0.945608	0.14274	0.250962	-0.215915	0.275007	0.102994	-0.37707	-0.00868224	-0.347399	0.0894982	-0.327348	0.00863031	0.884403	0.495695	0.448901	0	0.0370307	0.105678
B5-1	BLR	Cheeca Rocks	inshore	30	control	30-31	lightyellow	B5	B	mostly Breviolum	31	Validation	0.140124	-1.58641	-0.325539	0.616358	0.24245	0.635987	-0.621488	-0.125006	-0.158429	-0.318326	0.186501	0.494672	0.0271541	1.61636	-1.26188	0.436162	-0.227692	-0.2567	-0.21927	1.47716	-0.0679388	0.728574	-0.307573	0.121679	0.289244	0.516015	-0.756331	-0.354759	-0.204233	-0.498179	-0.456009	0.405992	-0.0232698	0.0370307	0.280956	0.283329	-0.106249
D4-8	BLR	Cheeca Rocks	inshore	30	control	30-31	grey60	D4	D	mostly Durusdinium	31	Training	-0.358454	-1.59074	0.295135	0.181421	0.0894982	0.293959	0.445727	0.0384362	-0.254978	-0.940645	0.697774	0.0538064	-0.0908029	-0.0144996	0.258217	-0.129734	0.326537	0.0229004	0.288063	-0.21424	-0.184425	0.445727	-0.0709665	0.273814	-0.0380063	-0.828793	-0.392137	-0.137648	-0.202572	-0.657445	0.253384	-0.401635	0.215368	-0.0291463	-0.171368	-0.736966	-0.0394883
D5-8	BLR	Cheeca Rocks	inshore	30	control	30-31	grey60	D5	D	mix of Breviolum & Durusdinium	31	Training	0.151859	-0.562772	0.0496308	-0.027675	-0.0785637	0.206643	0.24123	-0.199255	0.215368	0.306846	0.0894982	0.187768	0.0271541	1.14209	-1.23447	0.187768	-0.481969	0.297485	-0.307573	1.04614	-0.110916	0.176323	-0.351074	0.0867838	0.0717627	0.00288251	-0.0262051	-0.293359	-0.537424	-0.373327	-0.190997	0.0551957	0.0908534	0.21661	-0.0439433	0.181421	-0.0203404
B5-2	BLR	Cheeca Rocks	inshore	32	high	32-31	lightyellow	B5	B	mostly Breviolum	31	Validation	-0.139236	-1.41504	-0.132894	0.0243197	0.259423	0.461529	0.0342157	0.168642	0.0813396	0.125651	-0.227692	-0.673463	-0.139236	0.621056	-0.971431	0.221568	-0.145605	0.27858	-0.263612	0.518031	0.329985	0.00432161	0.195348	0.366252	-0.0603973	-0.426625	0.352759	-0.360305	0.613532	-0.174621	-0.107803	0.0100637	0.407081	-0.0619024	0.0114956	0.0285692	-0.45799
[truncated: 49 more columns]

## Sheet: CHD-lab to field
CHD=colony health designation, BLR=bleaching-resistant, BLS=bleaching-susceptible, INT=intermediately bleaching susceptible													HC=healthy control, SLS=sub-lethally stressed, AB=actively bleaching				empty cells=protein not detected
sample code	lab vs. field	CHD-lab	CHD	CHD-field	site	date	shelf	genotype	colony code	genotype x colony code	temperature	temperature-control vs. high	FHD(3)-lab	FHD: stressed?	FHD(4)	OFAVBQ_DN225308_c5_g1_i2	OFAVBQ_DN222422_c2_g1_i4	OFAVBQ_DN207472_c1_g1_i1	OFAVBQ_DN225503_c2_g1_i1	OFAVBQ_DN208218_c2_g1_i13	Validation	Validation 2	Validation 3	Validation 4	Validation 5	Validation 6	Validation 7	Validation 8
Cheeca-3132-7-19	field	BLR	BLR	BLR	Cheeca Rocks	2019-07-01	inshore	black(a)			30	control			HC	1.02729	1.26915	0.901033	1.01507	0.91925	Test	Test	Validation	Validation	Validation	Validation	Validation	Validation
Cheeca-3916-7-19	field	BLS	BLS	BLS	Cheeca Rocks	2019-07-01	inshore	lightgreen			30	control			HC	0.580743	0.31403	0.355578	0.60792	0.567473	Test	Test	Validation	Training	Training	Training	Validation	Validation
Cheeca-3939-7-19	field	BLR, BLS	INT	BLR, BLS	Cheeca Rocks	2019-07-01	inshore	darkred			30	control			HC	0.769522	0.632564	0.663339	1.17468	2.00256	Test	Test	Validation	Test	Test	Validation	Validation	Validation
CR-3165-7-19	field	BLR	BLR	BLR	Crocker Reef	2019-07-01	offshore	black(r)			30	control			HC	1.10462	1.08352	0.927644	1.0198	2.54026	Test	Test	Validation	Training	Training	Training	Validation	Validation
CR-3679-7-19	field	BLR, BLS	INT	BLR, BLS	Crocker Reef	2019-07-01	offshore	?			30	control			HC	0.739196	0.906484	0.465173	1.28076	1.68094	Test	Test	Validation	Validation	Validation	Training	Validation	Validation
CR-3986-7-19	field	BLS	BLS	BLS	Crocker Reef	2019-07-01	offshore	black(aa)			30	control			HC	0.843821	0.373368	1.01217	1.2037	2.25412	Test	Test	Validation	Training	Training	Validation	Validation	Validation
LC-3694-7-19	field	BLS	BLS	BLS	Little Conch	2019-07-01	offshore	black(f)			30	control			HC	1.64098	1.20257	0.645483	1.38923	0.927978	Test	Test	Validation	Training	Training	Training	Validation	Validation
LC-3921-7-19	field	BLR	BLR	BLR	Little Conch	2019-07-01	offshore	black(i)			30	control			HC	0.861244	1.65916	0.784591	1.30285	0.905817	Test	Test	Validation	Training	Training	Validation	Validation	Validation
LC-3989-7-19	field	BLR, BLS	INT	BLR, BLS	Little Conch	2019-07-01	offshore	black(g)			30	control			HC	0.990323	0.780191	1.07315	1.28121	1.2133	Test	Test	Validation	Training	Validation	Test	Validation	Validation
Rocks-3105-7-19	field	BLS	BLS	BLS	The Rocks	2019-07-01	inshore	skyblue			30	control			HC	1.76004	0.353893	0.620862	1.5174	1.07941	Test	Test	Validation	Training	Training	Training	Validation	Validation
Rocks-3148-7-19	field	BLR, BLS	INT	BLR, BLS	The Rocks	2019-07-01	inshore	skyblue			30	control			HC	1.52909	0.389972	1.09689	2.41236	1.05448	Test	Test	Validation	Training	Training	Training	Validation	Validation
Rocks-3906-7-19	field	BLR	BLR	BLR	The Rocks	2019-07-01	inshore	skyblue			30	control			HC	1.60779	0.921555	0.791069	3.71337	1.20499	Test	Test	Validation	Training	Training	Training	Validation	Validation
Cheeca-3132-8-19	field	BLR	BLR	BLR	Cheeca Rocks	2019-08-01	inshore	black(a)			32	high			HTA		1.23524	0.751189	1.18694	0.901298	Validation		Test				Validation	Test
Cheeca-3916-8-19	field	BLS	BLS	BLS	Cheeca Rocks	2019-08-01	inshore	lightgreen			32	high			AB		0.969799	1.59572	1.42298	0.925447	Validation		Test				Validation	Test
Cheeca-3939-8-19	field	BLR, BLS	INT	BLR, BLS	Cheeca Rocks	2019-08-01	inshore	darkred			32	high			SLS		1.36573	1.72641	1.46548	0.710832	Validation		Test				Validation	Test
LC-3694-8-19	field	BLS	BLS	BLS	Little Conch	2019-08-01	offshore	black(f)			32	high			AB		0.335696	0.455207	1.43263	1.05398	Validation		Test				Validation	Test
LC-3921-8-19	field	BLR	BLR	BLR	Little Conch	2019-08-01	offshore	black(i)			32	high			HTA		0.555491	0.85378	1.41612	1.03442	Validation		Test				Validation	Test
LC-3989-8-19	field	BLR, BLS	INT	BLR, BLS	Little Conch	2019-08-01	offshore	black(g)			32	high			SLS		0.180763	0.290392	1.41139	1.19516	Validation		Test				Validation	Test
CR-3165-8-19	field	BLR	BLR	BLR	Crocker Reef	2019-08-01	offshore	black(r)			32	high			HTA		0.827652	0.744864	1.17232	0.927978	Validation		Test				Validation	Test
CR-3679-8-19	field	BLR, BLS	INT	BLR, BLS	Crocker Reef	2019-08-01	offshore	?			32	high			SLS		1.29407	1.10716	1.03652	0.905817	Validation		Test				Validation	Test
CR-3986-8-19	field	BLS	BLS	BLS	Crocker Reef	2019-08-01	offshore	black(aa)			32	high			AB		0.611306	0.798377	1.37781	1.2133	Validation		Test				Validation	Test
Rocks-3105-8-19	field	BLS	BLS	BLS	The Rocks	2019-08-01	inshore	skyblue			32	high			AB		0.555518	0.674114	1.09885	1.07941	Validation		Test				Validation	Test
Rocks-3148-8-19	field	BLR, BLS	INT	BLR, BLS	The Rocks	2019-08-01	inshore	skyblue			32	high			SLS		0.7621	0.973914	2.61865	1.05448	Validation		Test				Validation	Test
Rocks-3906-8-19	field	BLR	BLR	BLR	The Rocks	2019-08-01	inshore	skyblue			32	high			HTA		0.580878	0.653125	4.98859	1.20499	Validation		Test				Validation	Test
C5-1	lab	BLS	BLS	BLS	Little Conch	2017-08-01	offshore	black(a)	C5	C	30	control	HC	no	HC	0.351	0.88	1.34	1.035	1.03	Training	Training	Training	Training	Training	Test	Training	Training
B5-4	lab	BLR	BLR	BLS	Cheeca Rocks	2017-08-01	inshore	lightyellow	B5	B	33	high	SLS	no	SLS	1.056	0.832	1.418	1.038	1.86	Validation	Training	Training	Training	Training	Training	Training	Training
A2-2	lab	BLS	BLS	BLR	The Rocks	2017-08-01	inshore	skyblue	A2	A	30	control	HC	no	HC	0.978	0.869	1.468	1.01	1.119	Training	Validation	Training	Training	Training	Training	Training	Training
A4-5	lab	BLR	BLR	BLR, BLS	The Rocks	2017-08-01	inshore	skyblue	A4	A	32	high	HC	acclimating	HTA	0.423	0.425	1.621	4.738	2.267	Training	Training	Training	Training	Training	Training	Training	Training
B3-1	lab	BLR	BLR	BLR	Cheeca Rocks	2017-08-01	inshore	black(c)	B3	B	32	high	SLS	acclimating	HTA	1.316	0.996	1.573	2.207	1.403	Validation	Training	Training	Training	Training	Training	Training	Training
C5-2	lab	BLS	BLS	BLS	Little Conch	2017-08-01	offshore	black(a)	C5	C	32	high	AB	yes	AB	0.39	0.634	1.038	2.19	1.853	Training	Validation	Training	Training	Training	Training	Training	Training
A4-1	lab	BLR	BLR	BLR, BLS	The Rocks	2017-08-01	inshore	skyblue	A4	A	30	control	HC	no	HC	0.637	0.782	1.406	1.655	1.547	Training	Training	Training	Validation	Validation	Test	Training	Training
C2-2	lab	BLS	BLS	BLS	Little Conch	2017-08-01	offshore	black(b)	C2	C	30	control	HC	no	HC	1.693	0.607	1.387	0.888	0.767	Validation	Training	Training	Test	Training	Validation	Training	Training
D5-2	lab	BLR	BLR	BLS	Cheeca Rocks	2017-08-01	inshore	grey60	D5	D	30	control	HC	no	HC	1.164	0.716	0.851	0.977	0.785	Training	Validation	Training	Validation	Validation	Training	Training	Training
A4-8	lab	BLR	BLR	BLR, BLS	The Rocks	2017-08-01	inshore	skyblue	A4	A	30	control	HC	no	HC	0.649	0.692	1.45	1.411	1.048	Validation	Training	Training	Training	Training	Training	Training	Training
C5-7	lab	BLS	BLS	BLS	Little Conch	2017-08-01	offshore	black(a)	C5	C	30	control	HC	no	HC	0.77	0.42	1.049	1.682	1.281	Training	Training	Training	Training	Training	Training	Training	Training
D5-3	lab	BLR	BLR	BLS	Cheeca Rocks	2017-08-01	inshore	grey60	D5	D	32	high	HC	acclimating	HTA	1.165	0.978	1.189	1.128	0.819	Training	Validation	Training	Training	Training	Validation	Training	Training
A4-7	lab	BLR	BLR	BLR, BLS	The Rocks	2017-08-01	inshore	skyblue	A4	A	33	high	HC	acclimating	HTA	1.151	0.724	0.733	1.025	1.183	Training	Training	Training	Training	Training	Training	Training	Training
C5-8	lab	BLS	BLS	BLS	Little Conch	2017-08-01	offshore	black(a)	C5	C	33	high	AB	yes	AB	0.779	0.539	0.916	1.175	0.88	Training	Training	Training	Validation	Validation	Training	Training	Training
D5-5	lab	BLR	BLR	BLS	Cheeca Rocks	2017-08-01	inshore	grey60	D5	D	33	high	HC	acclimating	HTA	0.815	0.787	0.93	1.096	1.129	Training	Training	Training	Training	Training	Test	Training	Training
B5-1	lab	BLR	BLR	BLS	Cheeca Rocks	2017-08-01	inshore	lightyellow	B5	B	30	control	HC	no	HC	0.774	0.854	1.533	0.967	1.183	Validation	Training	Training	Training	Training	Training	Training	Training
D4-8	lab	BLR	BLR	BLS	Cheeca Rocks	2017-08-01	inshore	grey60	D4	D	30	control	HC	no	HC	1.616	1.254	1.134	0.942	1.064	Training	Validation	Training	Test	Test	Validation	Training	Training
D5-8	lab	BLR	BLR	BLS	Cheeca Rocks	2017-08-01	inshore	grey60	D5	D	30	control	HC	no	HC	0.832	0.716	0.981	1.14	0.947	Training	Training	Training	Validation	Training	Training	Training	Training
B5-2	lab	BLR	BLR	BLS	Cheeca Rocks	2017-08-01	inshore	lightyellow	B5	B	32	high	SLS	no	SLS	1.04	0.904	1.017	1.014	1.197	Training	Training	Training	Training	Training	Training	Training	Training

[truncated: 3 more sheets: CHD-lab to field (50), 16 field proteins, Jul-Aug]
